# Supplementary material for: Evaporation kinetics of continuous water and dispersed oil droplets
Source: Royal Society of Chemistry journal article supplement (doi:10.1039/d0sm01116a), 2020-01-01
Supplement: d0sm01116a1.pdf [file d0sm01116a1.pdf]

Electronic Supplemental Information (ESI)

### Evaporation kinetics of continuous water and dispersed oil droplets

Katsuyuki Hasegawa<sup>a,b</sup> and Susumu Inasawa<sup>b,c\*</sup>

- a. Shiseido Global Innovation Center, 1-2-11 Takashima, Nishi-ku, Yokohama, Kanagawa, 220-0011, Japan
- b. Graduate School of Bio-Applications and Systems Engineering, Tokyo University of Agriculture and Technology, 2-24-16 Nakacho, Koganei, Tokyo, 184-8588, Tokyo, Japan.
- c. Department of Applied Physics and Chemical Engineering, Tokyo University of Agriculture and Technology.

E-mail: inasawa@cc.tuat.ac.jp

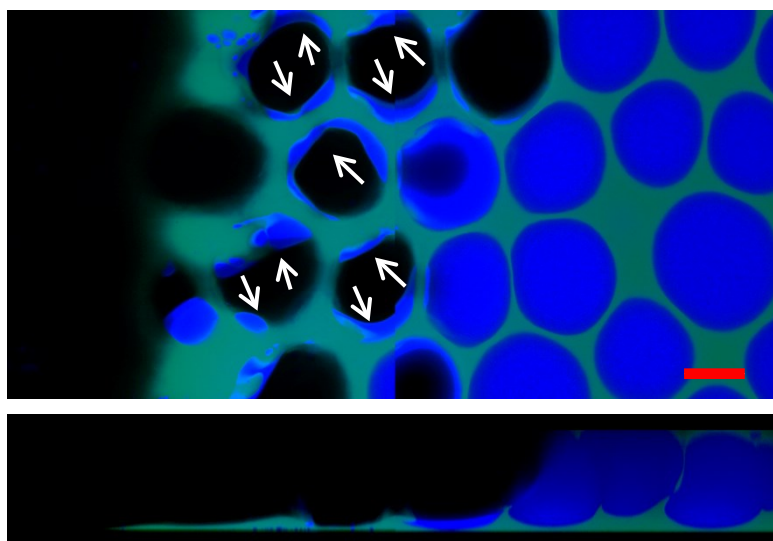

Fig. S1 Confocal microscope images of a drying sample near the liquid-air interface. The top image shows a xy-plane of the sample near the glass substrate. The corresponding z-scanned image was shown in the bottom. Blue oil phase stuck to the green water phase indicated by the white arrows, suggesting pinning of oil phase by the residual water phase. Scale bar is 50  $\mu\text{m}$ .
